# Supplementary material for: A Risk Factor Analysis of SARS-CoV-2 Infection in Animals in COVID-19-Affected Households
Source: MDPI journal article supplement (doi:10.3390/v15030731), 2023-03-11
Supplement: s1 [file s1]

**Questionnaire for SARS-CoV-2 positive pet owners**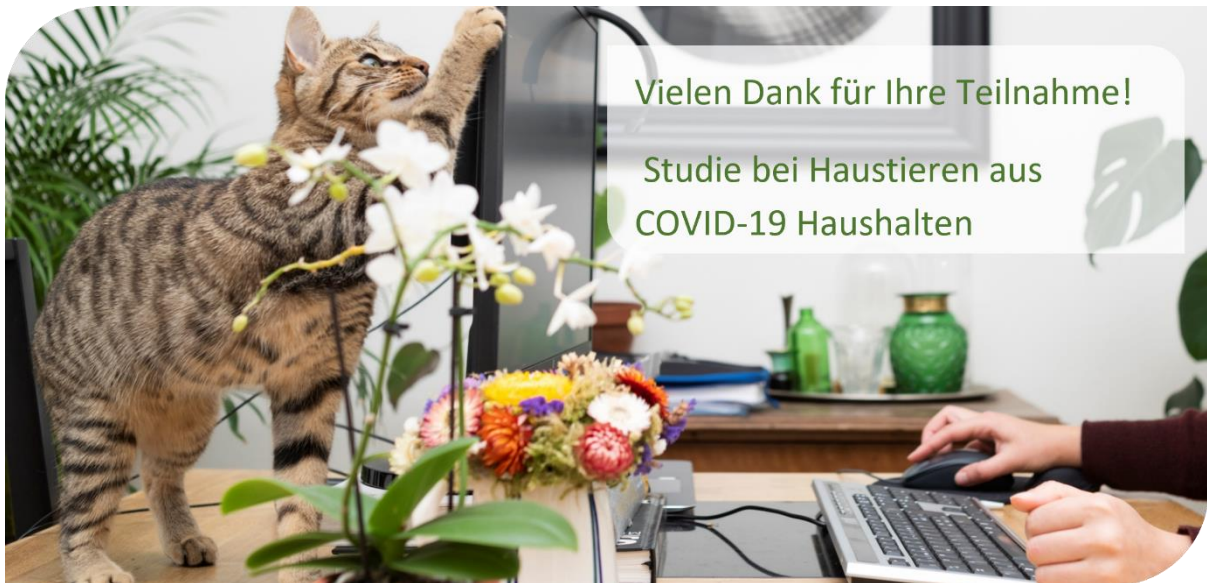

The study "Investigation on SARS-CoV-2 in pets" collects data on pet handling and hygiene in COVID-19 households. The questionnaire is aimed at SARS-CoV-2 positive pet owners or pet owners who have tested positive for SARS-CoV-2 within the last 6 months.

The questionnaire will be completed by one of the persons in the household who has COVID-19 ("participant"). This person will also be asked to fill in the details of your household members (housemate 1, 2, 3, 4). PLEASE ASSIGN THE SAME NUMBER TO YOUR HOUSEMATES ACCORDING TO THE CONSENT FORM!

The questionnaire has been prepared for a household consisting of a maximum of 5 persons. If there are more than 5 people living in the household, please contact us.

The data will be kept strictly confidential and anonymous.

Thank you very much!

**A. General questions for household members**

1a. Please enter your study number, which you will find on the consent form.  
USZ- \_\_\_\_\_

2a. Please enter today's date. (Date format: dd.mm.yyyy)  
\_\_\_\_\_

3a. How many pets live in your household? (One choice per row)

|      | 0 | 1 | 2 | 3 | 4 | 5 | 6 | 7 |
|------|---|---|---|---|---|---|---|---|
| Cats |   |   |   |   |   |   |   |   |

|               |  |  |  |  |  |  |  |  |
|---------------|--|--|--|--|--|--|--|--|
| Dogs          |  |  |  |  |  |  |  |  |
| Other animals |  |  |  |  |  |  |  |  |

4a. How many other household members live in your household besides you? Please choose one of the following answers:  
0; 1; 2; 3; 4; 5 (as dropdown menu)

a. Age of the household members (one choice per row)

|             | Under 18 years | 18 – 30 years | 31 – 40 years | 41 – 60 years | Over 60 years |
|-------------|----------------|---------------|---------------|---------------|---------------|
| Participant |                |               |               |               |               |
| Roommate 1  |                |               |               |               |               |
| Roommate 2  |                |               |               |               |               |
| Roommate 3  |                |               |               |               |               |
| Roommate 4  |                |               |               |               |               |

b. Gender of household members (one choice per row)

|             | male | female | diverse | No answer |
|-------------|------|--------|---------|-----------|
| Participant |      |        |         |           |
| Roommate 1  |      |        |         |           |
| Roommate 2  |      |        |         |           |
| Roommate 3  |      |        |         |           |
| Roommate 4  |      |        |         |           |

c. Which household members take care of the pet? (one choice per row)

|             | Yes | No | No answer |
|-------------|-----|----|-----------|
| Participant |     |    |           |
| Roommate 1  |     |    |           |

|               |  |  |  |
|---------------|--|--|--|
| Roommate<br>2 |  |  |  |
| Roommate<br>3 |  |  |  |
| Roommate<br>4 |  |  |  |

- d. Are there any household members who are at risk\*? (one choice per row)

|               | Yes | No | No<br>answer |
|---------------|-----|----|--------------|
|               |     |    |              |
| Participant   |     |    |              |
| Roommate<br>1 |     |    |              |
| Roommate<br>2 |     |    |              |
| Roommate<br>3 |     |    |              |
| Roommate<br>4 |     |    |              |

\*Risk patients are e.g. persons >65 years, pregnant women, immunocompromised persons, persons with diabetes, high blood pressure, cardiovascular diseases or cancer.

- e. Which household member(s) has/have tested positive for COVID-19? Please indicate the date of the first positive COVID-19 test as a comment.

|               | Yes | Date of first positive COVID-19 test |
|---------------|-----|--------------------------------------|
| Participant   |     |                                      |
| Roommate<br>1 |     |                                      |
| Roommate<br>2 |     |                                      |
| Roommate<br>3 |     |                                      |
| Roommate<br>4 |     |                                      |

- 5a. Did you know that there are recommendations for owners of dogs and cats in connection with COVID-19 from the Federal Food Safety and Veterinary Office (FSVO)? Please choose one of the following answers:  
Yes/No

## B. General hygiene

6a. Hand washing behaviour BEFORE COVID-19 diagnosis: How many times a day do you wash your hands with soap?

|             | Never | 1-2 times | 3-4 times | 5-6 times | 7-12 times | more than 12 times | no answer |
|-------------|-------|-----------|-----------|-----------|------------|--------------------|-----------|
| Participant |       |           |           |           |            |                    |           |
| Roommate 1  |       |           |           |           |            |                    |           |
| Roommate 2  |       |           |           |           |            |                    |           |
| Roommate 3  |       |           |           |           |            |                    |           |
| Roommate 4  |       |           |           |           |            |                    |           |

7a. Has your hand hygiene changed since a household member got COVID-19?

|             | YES, I wash/disinfect my hands more often than before. | NO, unchanged. | No answer |
|-------------|--------------------------------------------------------|----------------|-----------|
|             |                                                        |                |           |
| Participant |                                                        |                |           |
| Roommate 1  |                                                        |                |           |
| Roommate 2  |                                                        |                |           |
| Roommate 3  |                                                        |                |           |
| Roommate 4  |                                                        |                |           |

8a. Behaviour towards coughing/sneezing BEFORE COVID-19 diagnosis: do you wash your hands after coughing/sneezing?

|             | Coughing |       |        |       |           | Sneezing |       |        |       |           |
|-------------|----------|-------|--------|-------|-----------|----------|-------|--------|-------|-----------|
|             | always   | often | rarely | never | No answer | always   | often | rarely | never | No answer |
| Participant |          |       |        |       |           |          |       |        |       |           |
| Room mate 1 |          |       |        |       |           |          |       |        |       |           |
| Room mate 2 |          |       |        |       |           |          |       |        |       |           |
| Room mate 3 |          |       |        |       |           |          |       |        |       |           |
| Room mate 4 |          |       |        |       |           |          |       |        |       |           |

|             | Coughing |       |        |       |           | Sneezing |       |        |       |           |
|-------------|----------|-------|--------|-------|-----------|----------|-------|--------|-------|-----------|
|             | always   | often | rarely | never | No answer | always   | often | rarely | never | No answer |
| Participant |          |       |        |       |           |          |       |        |       |           |
| Room mate 1 |          |       |        |       |           |          |       |        |       |           |
| Room mate 2 |          |       |        |       |           |          |       |        |       |           |
| Room mate 3 |          |       |        |       |           |          |       |        |       |           |
| Room mate 4 |          |       |        |       |           |          |       |        |       |           |

9a. Behaviour towards coughing/sneezing BEFORE COVID-19 diagnosis: Do you cough/sneeze into a tissue?

10a. Has your behaviour towards coughing/sneezing changed during the COVID-19 illness?

### C. Pet hygiene

11a. How often do you wash your pet(s) toys?

|                 | daily | weekly | Every 2 weeks | monthly | Half-yearly | Less often | My pet(s) has/have no toys |
|-----------------|-------|--------|---------------|---------|-------------|------------|----------------------------|
| before COVID-19 |       |        |               |         |             |            |                            |
| during COVID-19 |       |        |               |         |             |            |                            |

12a. How often is your pet(s) bed washed?

|                 | daily | weekly | Every 2 weeks | monthly | Half-yearly | Less often | My pet(s) has/have no bed |
|-----------------|-------|--------|---------------|---------|-------------|------------|---------------------------|
| before COVID-19 |       |        |               |         |             |            |                           |
| during COVID-19 |       |        |               |         |             |            |                           |

13a. How often is your pet(s) food bowl washed?

|             | I wash/disinfect my hands more often afterwards |                                |           | I cough/sneeze more often into a handkerchief |                                |           |
|-------------|-------------------------------------------------|--------------------------------|-----------|-----------------------------------------------|--------------------------------|-----------|
|             | YES                                             | NO, my behaviour is unchanged. | no answer | YES                                           | NO, my behaviour is unchanged. | no answer |
| Participant |                                                 |                                |           |                                               |                                |           |
| Room mate 1 |                                                 |                                |           |                                               |                                |           |
| Room mate 2 |                                                 |                                |           |                                               |                                |           |
| Room mate 3 |                                                 |                                |           |                                               |                                |           |
| Room mate 4 |                                                 |                                |           |                                               |                                |           |

|                 | daily | weekly | Every<br>2<br>weeks | monthly | Half-<br>yearly | Less<br>often | My<br>pet(s)<br>has/have<br>no bowl |
|-----------------|-------|--------|---------------------|---------|-----------------|---------------|-------------------------------------|
| before COVID-19 |       |        |                     |         |                 |               |                                     |
| during COVID-19 |       |        |                     |         |                 |               |                                     |

14a. What do you use to clean your pet(s) food bowl?

Please select the answers that apply (multiple answers possible):

|                          |                                         |
|--------------------------|-----------------------------------------|
| <input type="checkbox"/> | with water                              |
| <input type="checkbox"/> | with soap and water                     |
| <input type="checkbox"/> | with a separate cloth                   |
| <input type="checkbox"/> | with the same cloth I use for my dishes |
| <input type="checkbox"/> | in the dishwasher                       |
| <input type="checkbox"/> | with a special detergent/disinfectant   |
| <input type="checkbox"/> | my pet(s) does not have a food bowl     |

#### **D. Interaction with the pet(s) - Types of contact between household members and the pet(s)**

Please indicate how often which interaction takes place between which household member and the pet(s).

15a. Direct contact time with the pet(s) is usually:

|               | Over 8<br>hours<br>a day | 2-8<br>hours<br>a day | 1-2<br>hours<br>a day | 10 min to<br>1 hour a<br>day | under 10<br>minutes a<br>day | no<br>answer |
|---------------|--------------------------|-----------------------|-----------------------|------------------------------|------------------------------|--------------|
| Participant   |                          |                       |                       |                              |                              |              |
| Roommate<br>1 |                          |                       |                       |                              |                              |              |
| Roommate<br>2 |                          |                       |                       |                              |                              |              |
| Roommate<br>3 |                          |                       |                       |                              |                              |              |
| Roommate<br>4 |                          |                       |                       |                              |                              |              |

16a. Did you change your behaviour towards the animal when a household member became ill with COVID-19?

|             | Yes, contact more intense than before | Yes, contact was limited | No, contact unchanged as before | I don't know |
|-------------|---------------------------------------|--------------------------|---------------------------------|--------------|
| Participant |                                       |                          |                                 |              |
| Roommate 1  |                                       |                          |                                 |              |
| Roommate 2  |                                       |                          |                                 |              |
| Roommate 3  |                                       |                          |                                 |              |
| Roommate 4  |                                       |                          |                                 |              |

17a. During/since the COVID-19 diagnosis, does another person in the household take more care of the pet? Please choose one of the following answers:

|                          |                                                                               |
|--------------------------|-------------------------------------------------------------------------------|
| <input type="checkbox"/> | Participant                                                                   |
| <input type="checkbox"/> | Yes, housemate 1                                                              |
| <input type="checkbox"/> | Yes, housemate 2                                                              |
| <input type="checkbox"/> | Yes, housemate 3                                                              |
| <input type="checkbox"/> | Yes, housemate 4                                                              |
| <input type="checkbox"/> | No, the care of the pet is distributed as before                              |
| <input type="checkbox"/> | A person not living in the household takes care of the pet                    |
| <input type="checkbox"/> | The pet was taken to an external institution (animal shelter/boarding kennel) |
| <input type="checkbox"/> | Other:                                                                        |

**(Animal-specific part: The owner gets the species-specific section for each animal according to the indication above.)**

**E. Animal-specific questions for cat owners (Cat 1)**

Please answer the questionnaire for one cat only, if you own more cats you will be redirected later.

18a. Indicate the assigned ID number and the name of the animal.

ID number: \_\_\_\_\_

Name: \_\_\_\_\_

19a. Please indicate the sex of your cat.

male; male neutered; female; unknown (as a dropdown menu)

20a. Please indicate the age of your cat.

1; 2; 3; 4; 5; 6; 7; 8; 9; 10 ; 11; 12; 13; 14; 15; 16; 17; 18; 19; 20, over 20; unknown

21a. Where is the main residence of your cat? Please choose one of the following answers:

|                          |                                      |
|--------------------------|--------------------------------------|
| <input type="checkbox"/> | My cat stays exclusively in the flat |
|--------------------------|--------------------------------------|

|                          |                                                                             |
|--------------------------|-----------------------------------------------------------------------------|
| <input type="checkbox"/> | My cat lives exclusively in the flat and has access to the balcony/terrace. |
| <input type="checkbox"/> | My cat spends less than 2 hours per day* outside.                           |
| <input type="checkbox"/> | My cat spends 2-6 hours per day* outside.                                   |
| <input type="checkbox"/> | My cat spends 12 hours per day* outside.                                    |
| <input type="checkbox"/> | My cat only comes to feed and otherwise stays outside.                      |

\*Interpretation of a day of 24h

22a. Does your pet have any known pre-existing conditions\*? And is it under any therapy for this? If yes, please enter them in the comment field. Please choose one of the following answers: number

|                          |                                                                                        |
|--------------------------|----------------------------------------------------------------------------------------|
| <input type="checkbox"/> | No, my cat has no pre-existing conditions                                              |
| <input type="checkbox"/> | Yes, my cat has the following pre-existing conditions. Please enter your comment here: |
| <input type="checkbox"/> | I do not know if my cat has any pre-existing conditions.                               |

\* e.g.: Diabetes, heart disease, respiratory disease, cat flu, cancer etc.

23a. Does your cat show one or more of the following symptoms since COVID-19 diagnosis in a household member? Please select the answers that apply:

|                          |                                                                        |
|--------------------------|------------------------------------------------------------------------|
| <input type="checkbox"/> | sneezing                                                               |
| <input type="checkbox"/> | dry cough                                                              |
| <input type="checkbox"/> | cough with expectoration of mucus                                      |
| <input type="checkbox"/> | rapid or labored breathing (respiratory rate over 40/min if countable) |
| <input type="checkbox"/> | Breathing sounds                                                       |
| <input type="checkbox"/> | Nasal discharge                                                        |
| <input type="checkbox"/> | Eye discharge                                                          |
| <input type="checkbox"/> | Salivation                                                             |
| <input type="checkbox"/> | Vomiting                                                               |
| <input type="checkbox"/> | Diarrhea                                                               |
| <input type="checkbox"/> | tiredness, listlessness                                                |
| <input type="checkbox"/> | reduced appetite                                                       |
| <input type="checkbox"/> | I do not know                                                          |
| <input type="checkbox"/> | No, my animal has no symptoms                                          |

24a. Have you seen a veterinarian for these symptoms? If yes: What was the diagnosis and treatment?

|                          |                                                                                                       |
|--------------------------|-------------------------------------------------------------------------------------------------------|
| <input type="checkbox"/> | No, I have not seen a veterinarian.                                                                   |
| <input type="checkbox"/> | Yes, I have seen a veterinarian. The diagnosis and treatment were:<br>Please enter your comment here: |

25a. How often do you have very close contact with your cat ?

|                          | very often<br>(several<br>times a<br>day) | often<br>(daily) | rarely | never | no<br>answer |
|--------------------------|-------------------------------------------|------------------|--------|-------|--------------|
| Have hands licked<br>off |                                           |                  |        |       |              |
| Have face licked<br>off  |                                           |                  |        |       |              |
| Giving kisses            |                                           |                  |        |       |              |
| Giving treats            |                                           |                  |        |       |              |

26a. How often do you have the following types of contact with your cat?

|                               | Over 8<br>hours<br>a day | 2-8<br>hours<br>a day | 1-2<br>hours<br>a day | 10 min to<br>1 hour a<br>day | under 10<br>minutes a<br>day | never | no<br>answer |
|-------------------------------|--------------------------|-----------------------|-----------------------|------------------------------|------------------------------|-------|--------------|
| sleeping in the same bed      |                          |                       |                       |                              |                              |       |              |
| Lying together on the<br>sofa |                          |                       |                       |                              |                              |       |              |
| Stroking/cuddling             |                          |                       |                       |                              |                              |       |              |
| Walking                       |                          |                       |                       |                              |                              |       |              |
| Playing                       |                          |                       |                       |                              |                              |       |              |
| Staying in the same room      |                          |                       |                       |                              |                              |       |              |

27a. How often do you have indirect contact with your cat?

|                                                             | Over<br>2x<br>daily | 1-2x<br>daily | over<br>1x<br>per<br>week | 1x per<br>week | 1x per<br>month | rarely | never | no<br>answer |
|-------------------------------------------------------------|---------------------|---------------|---------------------------|----------------|-----------------|--------|-------|--------------|
| Give food                                                   |                     |               |                           |                |                 |        |       |              |
| Clean<br>up/remove<br>droppings<br>(garden/dung<br>box)     |                     |               |                           |                |                 |        |       |              |
| Cleaning the<br>droppings<br>box (e.g.<br>changing<br>sand, |                     |               |                           |                |                 |        |       |              |

|                           |  |  |  |  |  |  |  |  |
|---------------------------|--|--|--|--|--|--|--|--|
| washing,<br>disinfecting) |  |  |  |  |  |  |  |  |
|---------------------------|--|--|--|--|--|--|--|--|

#### F. Animal-specific questions for dog owners (Dog 2)

Please answer the questionnaire for one dog only, if you own more cats you will be redirected later.

18b. Indicate the assigned ID number and the name of the animal.

ID number: \_\_\_\_\_

Name: \_\_\_\_\_

19b. Please indicate the sex of your dog.

male; male neutered; female; unknown (as a dropdown menu)

20b. Please indicate the age of your dog.

1; 2; 3; 4; 5; 6; 7; 8; 9; 10 ; 11; 12; 13; 14; 15; 16; 17; 18; 19; 20, over 20; unknown

21b. How much time of the day does your dog spend outside?

|                          |                                                   |
|--------------------------|---------------------------------------------------|
| <input type="checkbox"/> | My dog spends less than 1h per day* outside.      |
| <input type="checkbox"/> | My dog spends less than 2 hours per day* outside. |
| <input type="checkbox"/> | My dog spends 2 -6 hours per day* outside.        |
| <input type="checkbox"/> | My dog spends 12 hours per day* outside.          |
| <input type="checkbox"/> | My dog spends the whole day outside.              |

\*Interpretation of a day of 24h

22b. Does your pet have any known pre-existing conditions\*? And is it under any therapy for this? If yes, please enter them in the comment field. Please choose one of the following answers:

|                          |                                                                                        |
|--------------------------|----------------------------------------------------------------------------------------|
| <input type="checkbox"/> | No, my dog has no pre-existing conditions                                              |
| <input type="checkbox"/> | Yes, my dog has the following pre-existing conditions. Please enter your comment here: |
| <input type="checkbox"/> | I do not know if my dog has any pre-existing conditions.                               |

\* e.g.: Diabetes, heart disease, respiratory disease, cat flu, cancer etc.

23b. Does your dog show one or more of the following symptoms since COVID-19 diagnosis in a household member? Please select the answers that apply:

|                          |                                   |
|--------------------------|-----------------------------------|
| <input type="checkbox"/> | sneezing                          |
| <input type="checkbox"/> | dry cough                         |
| <input type="checkbox"/> | cough with expectoration of mucus |

|  |                                                                        |
|--|------------------------------------------------------------------------|
|  | rapid or labored breathing (respiratory rate over 40/min if countable) |
|  | Breathing sounds                                                       |
|  | Nasal discharge                                                        |
|  | Eye discharge                                                          |
|  | Salivation                                                             |
|  | Vomiting                                                               |
|  | Diarrhea                                                               |
|  | tiredness, listlessness                                                |
|  | reduced appetite                                                       |
|  | I do not know                                                          |
|  | No, my animal has no symptoms                                          |

24b. Have you seen a veterinarian for these symptoms? If yes: What was the diagnosis and treatment?

|  |                                                                                                       |
|--|-------------------------------------------------------------------------------------------------------|
|  | No, I have not seen a veterinarian.                                                                   |
|  | Yes, I have seen a veterinarian. The diagnosis and treatment were:<br>Please enter your comment here: |

25b. How often do you have very close contact with your dog ?

|                            | very often<br>(several<br>times a<br>day) | often<br>(daily) | rarely | never | no<br>answer |
|----------------------------|-------------------------------------------|------------------|--------|-------|--------------|
| Having hands<br>licked off |                                           |                  |        |       |              |
| Having hands<br>licked off |                                           |                  |        |       |              |
| Giving kisses              |                                           |                  |        |       |              |
| Giving treats              |                                           |                  |        |       |              |

26b. How often do you have the following types of contact with your dog?

|                               | Over 8<br>hours<br>a day | 2-8<br>hours<br>a day | 1-2<br>hours<br>a day | 10 min to<br>1 hour a<br>day | under 10<br>minutes a<br>day | never | no<br>answer |
|-------------------------------|--------------------------|-----------------------|-----------------------|------------------------------|------------------------------|-------|--------------|
| sleeping in the same bed      |                          |                       |                       |                              |                              |       |              |
| Lying together on the<br>sofa |                          |                       |                       |                              |                              |       |              |
| Stroking/cuddling             |                          |                       |                       |                              |                              |       |              |
| Walking                       |                          |                       |                       |                              |                              |       |              |
| Playing                       |                          |                       |                       |                              |                              |       |              |
| Staying in the same room      |                          |                       |                       |                              |                              |       |              |

27b. How often do you have indirect contact with your dog?

|                             | Over<br>2x<br>daily | 1-2x<br>daily | over<br>1x<br>per<br>week | 1x per<br>week | 1x per<br>month | rarely | never | no<br>answer |
|-----------------------------|---------------------|---------------|---------------------------|----------------|-----------------|--------|-------|--------------|
| Give food                   |                     |               |                           |                |                 |        |       |              |
| Clean<br>up/remove<br>feces |                     |               |                           |                |                 |        |       |              |

### G. Animal-specific questions owners of other pets (other pet 1)

Please answer the questionnaire for one other animal only, if you own more cats you will be redirected later.

18c. Indicate the assigned ID number and the name of the animal.

ID number: \_\_\_\_\_

Name: \_\_\_\_\_

19c. What species is your animal?

Rabbit; guinea pig; hamster; turtle; mouse; rat; bird; other (as a dropdown menu)

20c. Please indicate the sex of your animal.

male; male neutered; female; unknown (as a dropdown menu)

21c. Please indicate the age of your animal.

1; 2; 3; 4; 5; 6; 7; 8; 9; 10 ; 11; 12; 13; 14; 15; 16; 17; 18; 19; 20; over 20; unknown

22c. The animal lives with me in my flat/house?

If the animal does not live in the apartment/house with you, please state the animal's whereabouts in the comments field.

|                          |         |
|--------------------------|---------|
| <input type="checkbox"/> | Yes     |
| <input type="checkbox"/> | No but: |

23c. How much time of the day does your animals spend outside?

|                          |                                                   |
|--------------------------|---------------------------------------------------|
| <input type="checkbox"/> | My pet never stays outside.                       |
| <input type="checkbox"/> | My pet spends less than 1h per day* outside.      |
| <input type="checkbox"/> | My pet spends less than 2 hours per day* outside. |

|  |                                           |
|--|-------------------------------------------|
|  | My pet spends 2-6 hours per day* outside. |
|  | My pet spends 12 hours per day* outside.  |
|  | My pet spends the whole day outside.      |

\*Interpretation of a day of 24h

24c. Does your pet have any known pre-existing conditions\*? And is it under any therapy for this? If yes, please enter them in the comment field. Please choose one of the following answers:

|  |                                                                                        |
|--|----------------------------------------------------------------------------------------|
|  | No, my pet has no pre-existing conditions                                              |
|  | Yes, my pet has the following pre-existing conditions. Please enter your comment here: |
|  | I do not know if my pet has any pre-existing conditions.                               |

\* e.g.: Diabetes, heart disease, respiratory disease, cat flu, cancer etc.

25c. Does your pet show one or more of the following symptoms since COVID-19 diagnosis in a household member? Please select the answers that apply:

|  |                                                                        |
|--|------------------------------------------------------------------------|
|  | sneezing                                                               |
|  | dry cough                                                              |
|  | cough with expectoration of mucus                                      |
|  | rapid or labored breathing (respiratory rate over 40/min if countable) |
|  | Breathing sounds                                                       |
|  | Nasal discharge                                                        |
|  | Eye discharge                                                          |
|  | Salivation                                                             |
|  | Vomiting                                                               |
|  | Diarrhea                                                               |
|  | tiredness, listlessness                                                |
|  | reduced appetite                                                       |
|  | I do not know                                                          |
|  | No, my animal has no symptoms                                          |

18c. Have you seen a veterinarian for these symptoms? If yes: What was the diagnosis and treatment?

|  |                                                                                                       |
|--|-------------------------------------------------------------------------------------------------------|
|  | No, I have not seen a veterinarian.                                                                   |
|  | Yes, I have seen a veterinarian. The diagnosis and treatment were:<br>Please enter your comment here: |

19c. How often do you have very close contact with your pet ?

|  |               |                  |        |       |              |
|--|---------------|------------------|--------|-------|--------------|
|  | very<br>often | often<br>(daily) | rarely | never | no<br>answer |
|--|---------------|------------------|--------|-------|--------------|

|                         |                       |  |  |  |  |
|-------------------------|-----------------------|--|--|--|--|
|                         | (several times a day) |  |  |  |  |
| Having hands licked off |                       |  |  |  |  |
| Having face licked off  |                       |  |  |  |  |
| Giving kisses           |                       |  |  |  |  |
| Giving treats           |                       |  |  |  |  |

20c. How often do you have the following types of contact with your pet?

|                            | Over 8 hours a day | 2-8 hours a day | 1-2 hours a day | 10 min to 1 hour a day | under 10 minutes a day | never | no answer |
|----------------------------|--------------------|-----------------|-----------------|------------------------|------------------------|-------|-----------|
| sleeping in the same bed   |                    |                 |                 |                        |                        |       |           |
| Lying together on the sofa |                    |                 |                 |                        |                        |       |           |
| Stroking/cuddling          |                    |                 |                 |                        |                        |       |           |
| Walking                    |                    |                 |                 |                        |                        |       |           |
| Playing                    |                    |                 |                 |                        |                        |       |           |
| Staying in the same room   |                    |                 |                 |                        |                        |       |           |

21c. How often do you have indirect contact with your pet?

|                                                              | Over 2x daily | 1-2x daily | over 1x per week | 1x per week | 1x per month | rarely | never | no answer |
|--------------------------------------------------------------|---------------|------------|------------------|-------------|--------------|--------|-------|-----------|
| Give food                                                    |               |            |                  |             |              |        |       |           |
| Clean up/remove droppings (clean enclosure/stable/cage etc.) |               |            |                  |             |              |        |       |           |
